# Supplementary material for: Non-lethal genotyping of Tribolium castaneum adults using genomic DNA extracted from wing tissue
Source: PLoS One. 2017 Aug 11;12(8):e0182564. doi: 10.1371/journal.pone.0182564 (PMC5553768; doi:10.1371/journal.pone.0182564)
Supplement: S1 Table — ATub’, alpha tubulin 1 upstream regulatory sequence; ExPCR, primer for extraction PCRs; FD, forward; RV, reverse. (XLSX) [file pone.0182564.s005.xlsx]

## Sheet: Hoja1
Primer groups	Primer	Sequence	Length	Est. product size	Used
alpha-tubulin 1 upstream regulatory sequence (ATub’)	ATub’ ExPCR FD	5’-AGATGTCTATGTATCTCCCGTGAAAC-3’	26 bp	616 bp	Figure 2B, Figure 3B, Figure 4C, S2 Fig B
	ATub’ ExPCR RV	5’-GAAATGGGATAACTTACCATTTTGG-3’	25 bp
white Exon 1-6	White E1-6 ExPCR FD	5’-AATGGACTACAATGTATCAATTTACAAGG-3’	29 bp	4,208 bp	Figure 3B
	White E1-6 ExPCR RV	5’-CACAAAACTGTAAATTTTCATTCGG-3’	25 bp
white Exon 6-12	White E6-10 ExPCR FD	5’-GGATGGAGTAATGAACATAAATGGAGTAC-3’	29 bp	4,295 bp	Figure 3B
	White E6-10 ExPCR RV	5’-TTAATAACACCAGATTGAATTCTCGC-3’	26 bp
SB while allele genotyping	SB Genotyping FD	5’-GCGAATTATGTGATAAATCTTCAATTG-3’	27 bp	577 bp	Figure 4C
	SB and Prl Genotyping RV	5’-GCATCATTTTTATTAACTCGGAATG-3’	25 bp
Prl white allele genotyping	Prl Genotyping FD	5’-ACCGAGTTAACGTAACTCTCATGG-3’	24 bp	349 bp	Figure 4C
	SB and Prl Genotyping RV	5’-GCATCATTTTTATTAACTCGGAATG-3’	25 bp
both (SB and Prl)	SB Genotyping FD	5’-GCGAATTATGTGATAAATCTTCAATTG-3’	27 bp	577 bp as well as 349 bp	Figure 4C
	Prl Genotyping FD	5’-ACCGAGTTAACGTAACTCTCATGG-3’	24 bp
	SB and Prl Genotyping RV	5’-GCATCATTTTTATTAACTCGGAATG-3’	25 bp
